# Supplementary material
Source: PubMed Central journal article supplement (PMC6768398)
Supplement: NIHMS1050504-supplement-1.pdf [file NIHMS1050504-supplement-1.pdf]

## Reporting Summary

Nature Research wishes to improve the reproducibility of the work that we publish. This form provides structure for consistency and transparency in reporting. For further information on Nature Research policies, see [Authors & Referees](#) and the [Editorial Policy Checklist](#).

### Statistical parameters

When statistical analyses are reported, confirm that the following items are present in the relevant location (e.g. figure legend, table legend, main text, or Methods section).

n/a | Confirmed

- The exact sample size ( $n$ ) for each experimental group/condition, given as a discrete number and unit of measurement
- An indication of whether measurements were taken from distinct samples or whether the same sample was measured repeatedly
- The statistical test(s) used AND whether they are one- or two-sided  
*Only common tests should be described solely by name; describe more complex techniques in the Methods section.*
- A description of all covariates tested
- A description of any assumptions or corrections, such as tests of normality and adjustment for multiple comparisons
- A full description of the statistics including central tendency (e.g. means) or other basic estimates (e.g. regression coefficient) AND variation (e.g. standard deviation) or associated estimates of uncertainty (e.g. confidence intervals)
- For null hypothesis testing, the test statistic (e.g.  $F$ ,  $t$ ,  $r$ ) with confidence intervals, effect sizes, degrees of freedom and  $P$  value noted  
*Give  $P$  values as exact values whenever suitable.*
- For Bayesian analysis, information on the choice of priors and Markov chain Monte Carlo settings
- For hierarchical and complex designs, identification of the appropriate level for tests and full reporting of outcomes
- Estimates of effect sizes (e.g. Cohen's  $d$ , Pearson's  $r$ ), indicating how they were calculated
- Clearly defined error bars  
*State explicitly what error bars represent (e.g. SD, SE, CI)*

*Our web collection on [statistics for biologists](#) may be useful.*

### Software and code

Policy information about [availability of computer code](#)

Data collection

Transmission electron microscopy (TEM) images were collected by Gatan Microscopy Suite (GMS) v3

Data analysis

Data was analyzed using GraphPad Prism software (La Jolla, CA); Flow data was analyzed by FlowJo v10 (Ashland, Oregon); TEM images were analyzed using ImageJ software v1.6.0\_65.

For manuscripts utilizing custom algorithms or software that are central to the research but not yet described in published literature, software must be made available to editors/reviewers upon request. We strongly encourage code deposition in a community repository (e.g. GitHub). See the Nature Research [guidelines for submitting code & software](#) for further information.

### Data

Policy information about [availability of data](#)

All manuscripts must include a [data availability statement](#). This statement should provide the following information, where applicable:

- Accession codes, unique identifiers, or web links for publicly available datasets
- A list of figures that have associated raw data
- A description of any restrictions on data availability

The data that support the findings of this study are available for the corresponding author upon request. Untargeted metabolomics data is available by request to corresponding author.

## Field-specific reporting

Please select the best fit for your research. If you are not sure, read the appropriate sections before making your selection.

Life sciences  Behavioural & social sciences  Ecological, evolutionary & environmental sciences

For a reference copy of the document with all sections, see [nature.com/authors/policies/ReportingSummary-flat.pdf](https://nature.com/authors/policies/ReportingSummary-flat.pdf)

## Life sciences study design

All studies must disclose on these points even when the disclosure is negative.

|                 |                                                                                                                                                                                                                                    |
|-----------------|------------------------------------------------------------------------------------------------------------------------------------------------------------------------------------------------------------------------------------|
| Sample size     | Sample size was chosen based on power analysis conducted by the "pwr" package from R with effect size of 0.1, alpha < 0.05, and power = 0.8.                                                                                       |
| Data exclusions | No data was excluded                                                                                                                                                                                                               |
| Replication     | Each experiment was repeated three times with a minimum of n = 5 biological replicates, unless otherwise stated. All attempts at replication were successful.                                                                      |
| Randomization   | This is not relevant to our study as this is not a case/control or clinical study.                                                                                                                                                 |
| Blinding        | Investigators were blinded to electron microscopy data when analyzing quantity and quality of the mitochondria between Ido1 <sup>-/-</sup> and WT mouse macrophages, young and old human MDMs, and PTH and veh treated human MDMs. |

## Reporting for specific materials, systems and methods

### Materials & experimental systems

| n/a                                 | Included in the study                                           |
|-------------------------------------|-----------------------------------------------------------------|
| <input checked="" type="checkbox"/> | <input type="checkbox"/> Unique biological materials            |
| <input type="checkbox"/>            | <input checked="" type="checkbox"/> Antibodies                  |
| <input checked="" type="checkbox"/> | <input type="checkbox"/> Eukaryotic cell lines                  |
| <input checked="" type="checkbox"/> | <input type="checkbox"/> Palaeontology                          |
| <input type="checkbox"/>            | <input checked="" type="checkbox"/> Animals and other organisms |
| <input checked="" type="checkbox"/> | <input type="checkbox"/> Human research participants            |

### Methods

| n/a                                 | Included in the study                              |
|-------------------------------------|----------------------------------------------------|
| <input checked="" type="checkbox"/> | <input type="checkbox"/> ChIP-seq                  |
| <input type="checkbox"/>            | <input checked="" type="checkbox"/> Flow cytometry |
| <input checked="" type="checkbox"/> | <input type="checkbox"/> MRI-based neuroimaging    |

## Antibodies

Antibodies used

Anti-Ido1 Abcam 2µg/ml ab55305  
 Anti-Kmo Abcam 1µg/ml ab130959  
 Anti-Kynu Abcam 1:1000 ab225916  
 Anti-3haao Abcam 2µg/ml ab106436  
 Anti-Human Qprt Abcam 1:1000 ab171944  
 Anti-Mouse Qprt Sigma-Aldrich 1µg/ml SAB1410425  
 Anti-Nmnat1 Abcam 1µg/ml ab45652  
 Anti-NadS Abcam 1:1000 ab45890  
 Anti-Drp1 BD Transduction Laboratories™ 1:1000 611113  
 Anti-Fis1 Proteintech 1:1000 10956-1-AP  
 Anti-LC3BII Cell Signaling Technology 1:1000 3868  
 Anti-Mff Proteintech 1:1000 17090-1-AP  
 Anti-Mfn1 Abcam 1:500 ab57602  
 Anti-Mfn2 Proteintech 1:500 12186-1-AP  
 Anti-Opa1 Santa Cruz Biotechnology 1:500 sc-393296  
 Anti-TIM17 Santa Cruz Biotechnology 1:500 sc-271152  
 Anti-TOM20 Santa Cruz Biotechnology 1:1000 sc-11415  
 Anti-VDAC Abcam 1:2000 14734  
 Anti-Sirt3 Cell Signaling Technology 1:1000 C73E3  
 Anti-Sod2-K68 Abcam 1:1000 ab137037  
 Anti-Sod2 Abcam 1:1000 ab16956  
 Anti-Ndufc2 Abcam 1µg/ml ab85359  
 Anti-COXIV Abcam 1µg/ml ab14744

Anti-PAR Trevigen 1:1000 4335-MC-100  
Anti-b-actin Cell Signaling Technology 1:2000 3700

Flow Antibodies:  
Formatted: Marker, Channel, Catalog #, Dilution, Clone, Supplier

CD14, APC-Cy7, 557831, 1:50, MφP9, BD Biosciences  
CD64, FITC, 560970, 1:50, 10.1, BD Biosciences  
CD206, PE, 566281, 1:50, 19.2, BD Biosciences  
CD68, PE-Cy7, 565595, 1:200, Y1/82A, BD Biosciences  
CD23, BV421, 338521, 1:50, EBVCS-5, BD Biosciences  
CD163, 563889, 555660, 1:50, GHI/61, BD Biosciences  
CD86, APC, 555660, 1:50, FUN-1, BD Biosciences  
EGR-2, APC, 1706691-82, 1:50, ERONGR2, Invitrogen  
CD206, BV711, 141727, 1:50, C068C2, BioLegend  
CD301, PE, 145703, 1:50, LOM-14, BioLegend  
CD80, BV421, 562611, 1:50, 16-10A1, BD Biosciences  
CD86, BV605, 563055, 1:50, GL1, BD Biosciences  
I-A/I-E (MHC Class II), PerCPCy5.5, 562363, 1:50, M5/114.15.2, BD Biosciences  
CD14, PE-Cy7, 553740, 1:50, rmC5-3 BD Biosciences

#### Validation

For immunoblotting, antibodies to KP and NAD+ synthetic enzymes were validated using positive controls wherein cDNAs for all enzymes were transfected in HEK cells, lysates serving as positive controls. All antibodies are validated in human tissue according to the manufacturer's website.

## Animals and other organisms

Policy information about [studies involving animals](#); [ARRIVE guidelines](#) recommended for reporting animal research

#### Laboratory animals

This study was conducted in accordance with NIH guidelines, and protocols were approved by the Institutional Animal Care and Use Committee at Stanford University. All mice were housed in an environment controlled, pathogen-free barrier facility on a 12 h light/dark cycle, temperature, and humidity, with food and water available ad libitum. IDO1 -/- mice backcrossed onto a C57BL/6J background were obtained from Jackson laboratories (Stock No. 005867, Ido1tm1Alm, original contributor: Andrew Mellor, Medical College Georgia) and IDO1+/- and IDO1+/- mice were intercrossed to generate +/+ and +/- genotypes. QPRT-/- (QPRTKO) mice were obtained from Lexicon Pharmaceuticals (The Woodlands, TX) on a C57BL/6J-129SvEv background.

#### Wild animals

This study did not involve the use of wild animals

#### Field-collected samples

This study did not involve the use of Field-collected samples

## Flow Cytometry

### Plots

Confirm that:

- The axis labels state the marker and fluorochrome used (e.g. CD4-FITC).
- The axis scales are clearly visible. Include numbers along axes only for bottom left plot of group (a 'group' is an analysis of identical markers).
- All plots are contour plots with outliers or pseudocolor plots.
- A numerical value for number of cells or percentage (with statistics) is provided.

### Methodology

#### Sample preparation

huMDMs were plated in 10 cm plates at 10 x 10<sup>6</sup> cells / well and were harvested using 0.25% trypsin-EDTA (Cat. No. 25200056, ThermoFisher Scientific, Pittsburgh, PA) at 37°C. Cells were then washed with FACS buffer (PBS with 2% FCS, 2mM EDTA, and 25mM HEPES), followed by incubation with blocking buffer (5% mouse serum in FACS buffer) for 15 minutes at 4°C. Cells were then stained with the desired antibody combinations for 30 minutes at 4°C. Dead cells were excluded with the addition of 0.5 µg/mL propidium iodide. Anti-human antibodies used for flow cytometry of huMDMs (Supplementary Materials, Table 2) and are as follows: CD14 APC-Cy7 (clone MφP9, BD Biosciences, San Jose, CA), CD64 FITC (Cat. No. 560970, clone 10.1, BD Biosciences), CD206 PE (Cat. No. 566281, clone 19.2, BD Biosciences), CD68 PE-Cy7 (Cat. No. 565595, clone Y1/82A, BD Biosciences), CD23 BV421 (Cat. No. 338521, clone EBVCS-5, BD Biosciences), CD163 563889 (Cat. No. 555660, clone GHI/61, BD Biosciences), CD86 APC (Cat. No. 555660, clone FUN-1, BD Biosciences). For the determination of mitochondrial superoxide by flow cytometry, cells were incubated with MitoSOX (3 µM) (ThermoFisher Scientific) at 37°C for 15 min. The media was then removed and cells were washed with HBSS/Ca/Mg twice. The cells were then collected in Eppendorf tubes using Cellstripper (Cat. No. 25-056-CI, Corning, Corning, NY) for 5 min at 37°C. Cells were

centrifuged at 1000 rpm for 5 min and the cell pellet was resuspended in RPMI supplemented with 3% FBS.

Instrument

BD FACSAria II (BD Biosciences)

Software

Raw FCS files were analyzed with FlowJo software (Treestar, Ashland, OR).

Cell population abundance

CD14+ cells consisted of nearly 95% of the population of cells collected per sample.

Gating strategy

The following controls were used: unstained cells, single-stained cells and dead cells. The cells were gated using forward and side scatter, as well as live/dead staining using DAPI (ThermoFisher Scientific).

Tick this box to confirm that a figure exemplifying the gating strategy is provided in the Supplementary Information.

In the format provided by the authors and unedited.

# Macrophage de novo NAD<sup>+</sup> synthesis specifies immune function in aging and inflammation

Paras S. Minhas<sup>1,2</sup>, Ling Liu<sup>3,4</sup>, Peter K. Moon<sup>1</sup>, Amit U. Joshi<sup>5</sup>, Christopher Dove<sup>6</sup>, Siddhita Mhatre<sup>1</sup>, Kevin Contrepois<sup>7</sup>, Qian Wang<sup>1</sup>, Brittany A. Lee<sup>7</sup>, Michael Coronado<sup>8</sup>, Daniel Bernstein<sup>8</sup>, Michael P. Snyder<sup>7</sup>, Marie Migaud<sup>9</sup>, Ravindra Majeti<sup>6</sup>, Daria Mochly-Rosen<sup>5</sup>, Joshua D. Rabinowitz<sup>3,4</sup> and Katrin I. Andreasson<sup>1,10,11\*</sup>

<sup>1</sup>Department of Neurology & Neurological Sciences, Stanford School of Medicine, Stanford, CA, USA. <sup>2</sup>Neurosciences Graduate Program, Stanford University, Stanford, CA, USA. <sup>3</sup>Lewis-Sigler Institute for Integrative Genomics, Princeton University, Princeton, NJ, USA. <sup>4</sup>Department of Chemistry, Princeton University, Princeton, NJ, USA. <sup>5</sup>Department of Chemical and Systems Biology, Stanford University, Stanford, CA, USA. <sup>6</sup>Department of Hematology, Stanford School of Medicine, Stanford, CA, USA. <sup>7</sup>Department of Genetics, Stanford School of Medicine, Stanford, CA, USA.

<sup>8</sup>Department of Pediatrics, Stanford School of Medicine, Stanford, CA, USA. <sup>9</sup>Mitchell Cancer Institute, University of South Alabama, Mobile, AL, USA.

<sup>10</sup>Stanford Neuroscience Institute, Stanford University, Stanford, CA, USA. <sup>11</sup>Stanford Immunology Program, Stanford University, Stanford, CA, USA.

\*e-mail: [kandreas@stanford.edu](mailto:kandreas@stanford.edu)

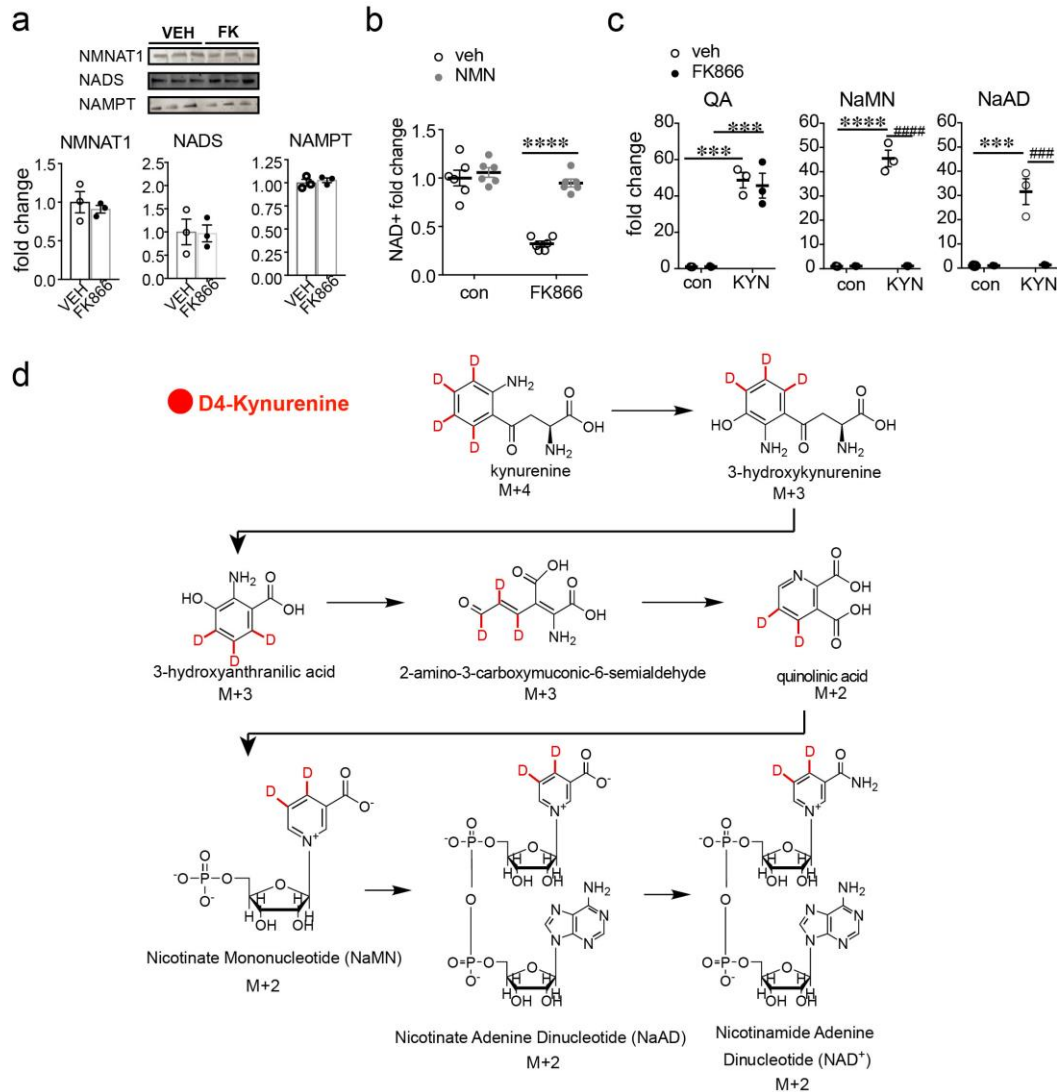

## Supplementary Figure 1

### Effects of the NAMPT inhibitor FK866 and KYN supplementation.

HuMDMs were treated with either vehicle or FK866 (10  $\mu$ M, 20 h) and were supplemented with either vehicle or KYN (25  $\mu$ M, 20 h). **a**, Representative western blot of NAD<sup>+</sup> synthetic enzymes NMNAT1 and NADS and NAMPT;  $n = 3$  per group, shown as mean  $\pm$  S.E. with protein levels normalized to  $\beta$ -actin; non-significance determined by Student's two-tailed  $t$  test. **b**, Administration of NMN to FK866-treated huMDMs restores NAD<sup>+</sup> levels, as measured by LC/MS;  $n = 6$  per group, represented as mean  $\pm$  S.E., two-way ANOVA: effects of NMN and FK866,  $P < 0.0001$  with Tukey post hoc test: \*\*\*\* $P < 0.0001$ . **c**, LC/MS measurements of QA, NaMN, NaAD;  $n = 6$  per group, represented as mean  $\pm$  S.E.; two-way ANOVA, for QA effect of KYN,  $P < 0.0001$ ; for NaMN, effects of KYN and FK866,  $P < 0.0001$ ; for NaAD, effects of KYN and FK866,  $P < 0.001$ ; Tukey post hoc tests: \*\*\* $P = 0.0001$  QA: veh-veh versus KYN-veh; \*\*\* $P = 0.0002$  QA: veh-FK866 versus KYN-FK866; \*\*\*\* $P < 0.0001$  NaMN: veh-veh versus KYN-veh; \*\*\*\* $P < 0.0001$  KYN-veh versus KYN-FK866; \*\*\* $P = 0.0002$  NaAD: veh-veh versus KYN-veh; \*\*\*\* $P = 0.0002$  NaAD: KYN-veh versus KYN-FK866. **d**, Reaction mechanism for isotope labeling of KYN to generate  $M+2$  de novo NAD<sup>+</sup>.

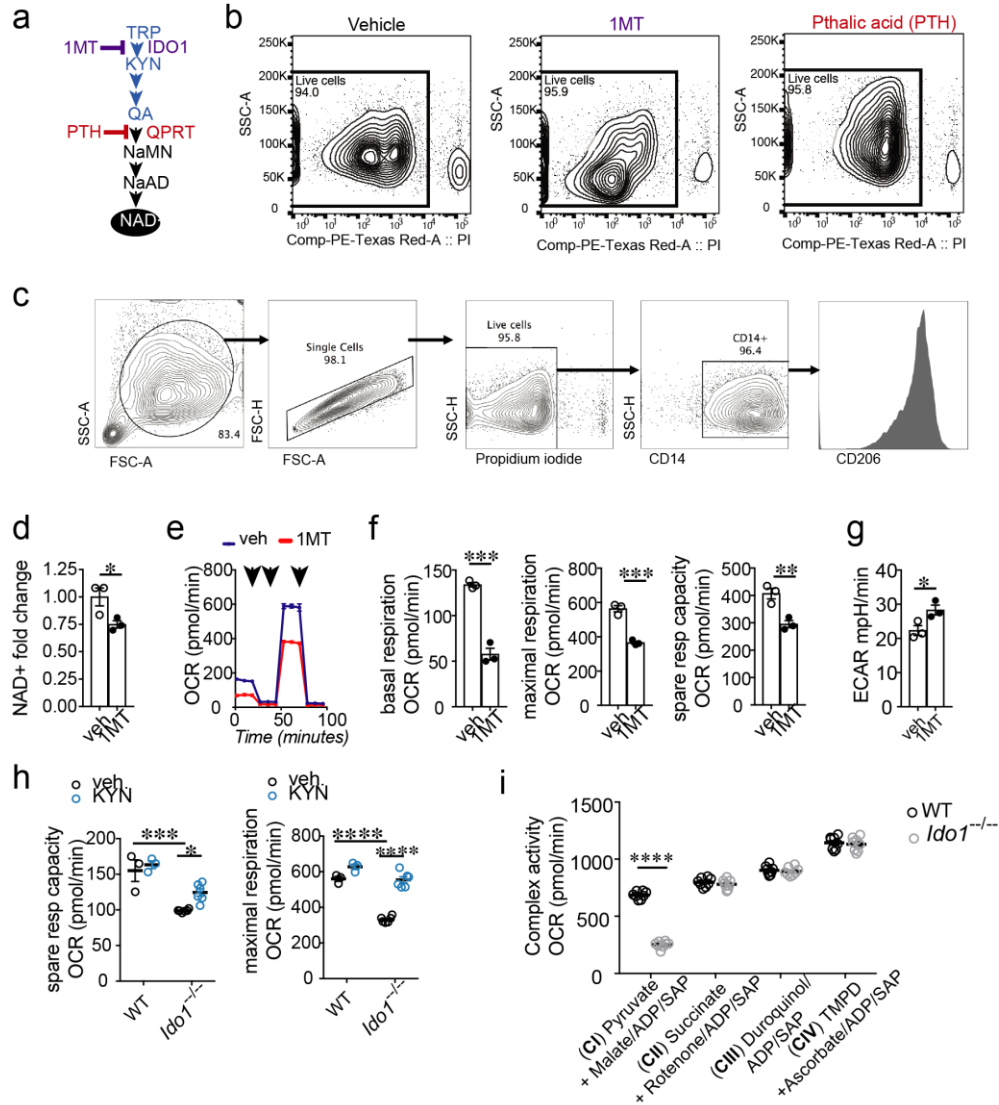

## Supplementary Figure 2

### Effects of the NAMPT inhibitor FK866 and KYN supplementation.

**a**, Diagram of the site of action of 1MT and phthalic acid (PTH), selective inhibitors of IDO1 and QPRT, respectively. **b**, Representative flow cytometry plot from three independent experiments of cells treated for 20 h with either vehicle, 1MT (200  $\mu$ M), or phthalic acid (PTH, 500  $\mu$ M) stained with propidium iodide ( $n = 25,000$ – $30,000$  cells per group). **c**, Gating strategy for huMDMs. **d–h**, HuMDMs were treated with the IDO1 inhibitor 1MT (200  $\mu$ M, 20 h). **d**, LC/MS measurement of NAD<sup>+</sup>;  $n = 3$  biologically independent samples per group, shown as mean  $\pm$  S.E.; \* $P = 0.0233$  by Student's two-tailed  $t$  test. **e**, Representative trace from three independent experiments for effect of 1MT on OCR,  $n = 10$  biologically independent samples/group, shown mean  $\pm$  S.E. **f**, Effects of 1MT on basal respiration, maximal respiration, and spare respiratory capacity;  $n = 3$  biologically independent samples per group, shown as mean  $\pm$  S.E.; \*\*\* $P = 0.0004$  for basal respiration, \*\*\* $P = 0.0006$  for maximal respiration, and \*\* $P = 0.0087$  for spare respiratory capacity by Student's two-tailed  $t$  test. **g**, Effect of 1MT on ECAR;  $n = 3$  biologically independent samples/group, mean  $\pm$  S.E.; \* $P = 0.0411$  by Student's two-tailed  $t$  test. **h**, Peritoneal macrophages from WT and *Ido1*<sup>-/-</sup> mice were supplemented with either vehicle or 25  $\mu$ M KYN for 20 h and assayed for spare respiratory capacity and maximal respiration;  $n = 6$  biologically independent samples per WT group and  $n = 9$  biologically independent samples per *Ido1*<sup>-/-</sup> group, represented as mean  $\pm$  S.E.; two-way ANOVA, effect of genotype  $P < 0.0001$  for both, effect of KYN  $P < 0.05$  and  $P < 0.0001$  for spare respiratory capacity and max respiration, respectively; Tukey post hoc \*\*\* $P = 0.0001$ , \* $P = 0.0200$ , and \*\*\*\* $P < 0.0001$ . **i**, Permeabilized macrophages from WT and *Ido1*<sup>-/-</sup> mice were stimulated with complex-specific substrates, including pyruvate + malate for assessing complex I, succinate + rotenone for complex II, duroquinol for complex III, and TMPD + ascorbate for complex IV. Data are represented as mean  $\pm$  S.E.;  $n = 8$  biologically independent samples per group; \*\*\*\* $P < 0.0001$  by Student's two-tailed  $t$  test.

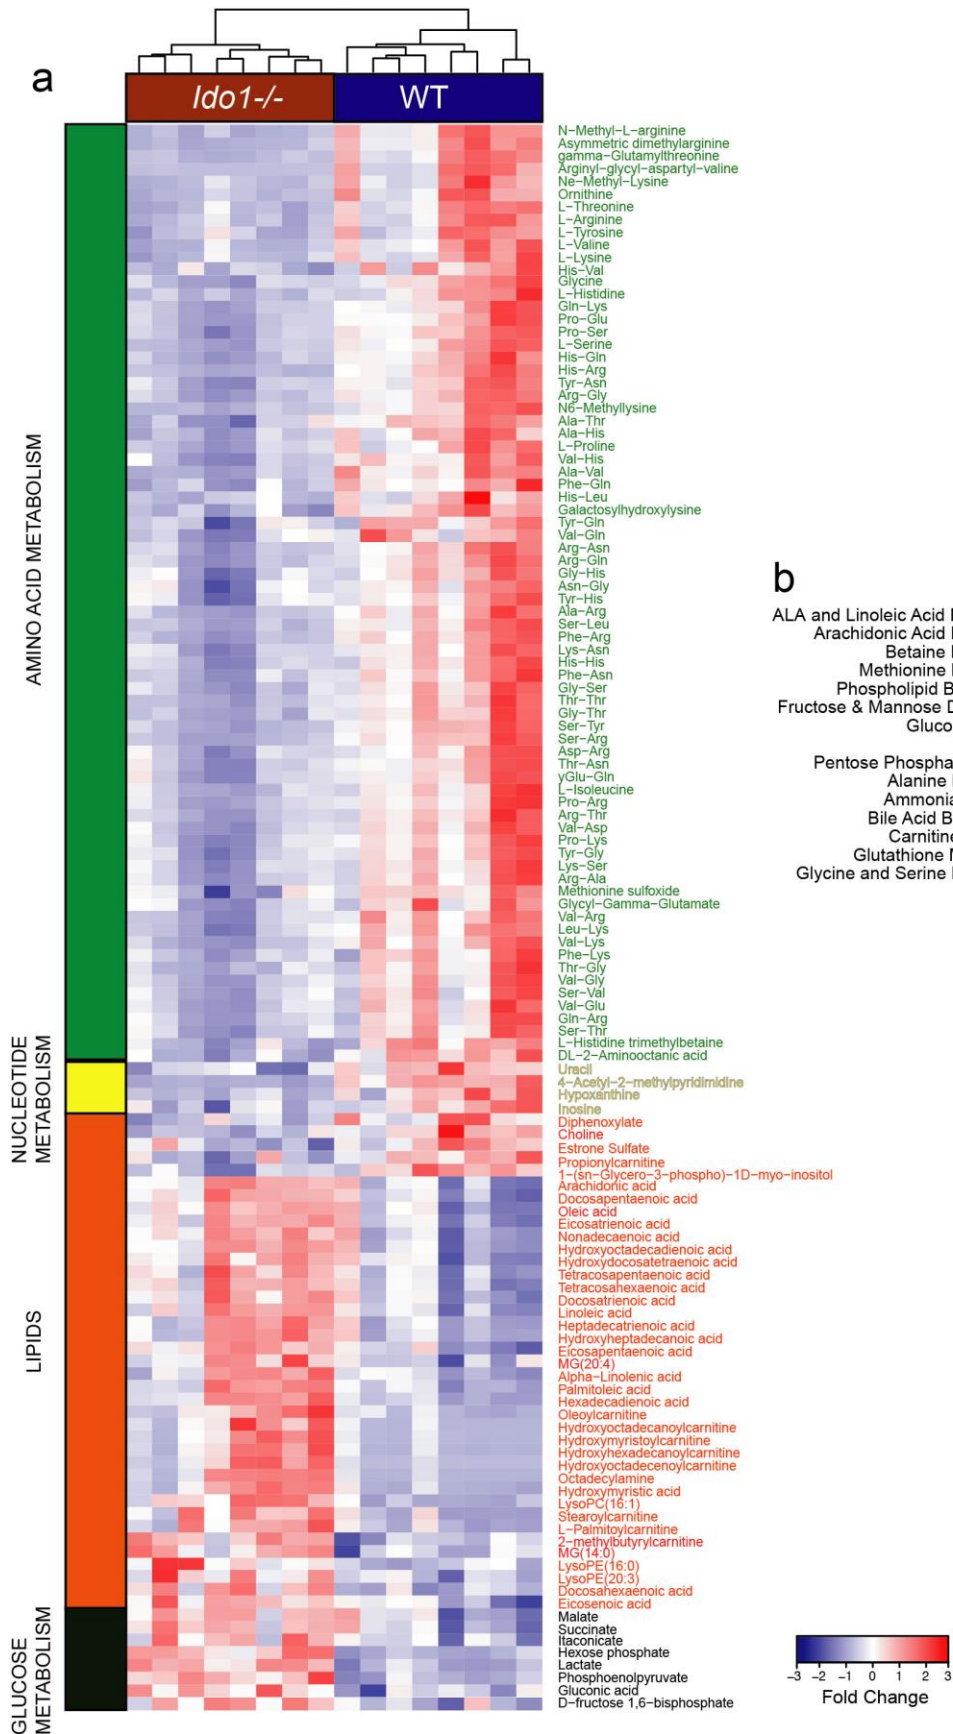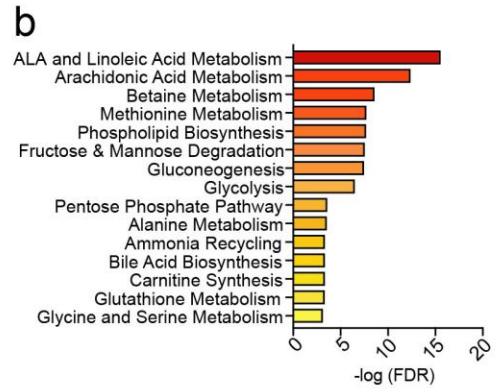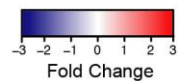



### Supplementary Figure 3

#### Untargeted metabolomic profiling of WT and *Ido1*<sup>-/-</sup> macrophages.

**a.** Hierarchical clustering of validated and significantly altered metabolites ( $q < 0.05$ ) are represented. *Ido1*<sup>-/-</sup> macrophages show disrupted amino acid metabolism and lipid metabolism and increased glycolysis ( $n = 8$  mice per group, two-tailed parametric Welch's *T*-test with multiple-hypothesis  $q$ -value correction. FDR  $< 0.05$  was considered significant). **b.** MBROLE enrichment analysis of untargeted metabolomics from comparison of *Ido1*<sup>-/-</sup> versus WT macrophages ( $n = 8$  per genotype).

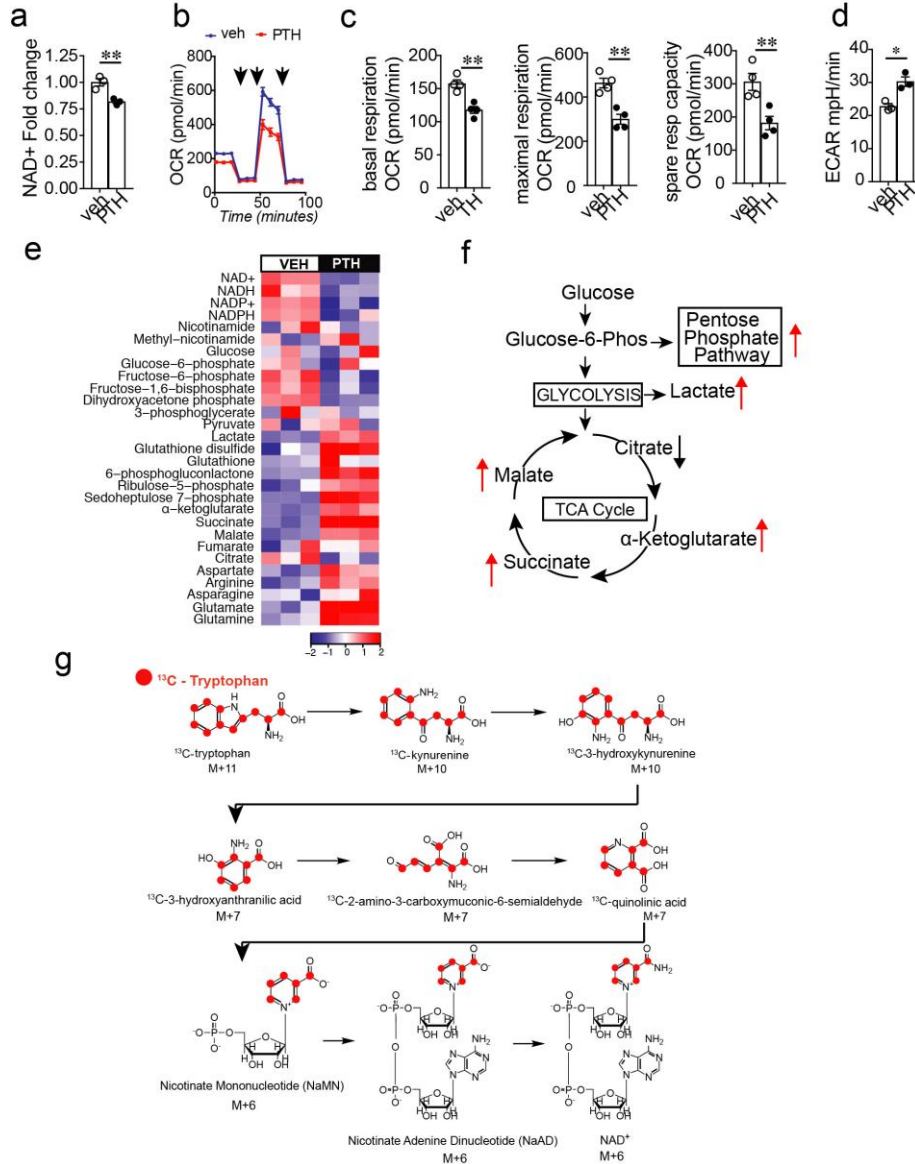

**Supplementary Figure 4**

**Inhibition of QPRT disrupts oxidative phosphorylation and cellular metabolism.**

**a–e**, HuMDMs were treated with vehicle or the QPRT inhibitor phthalic acid (PTH; 500  $\mu\text{M}$ , 20 h). **a**, LC/MS of NAD<sup>+</sup> with PTH treatment;  $n = 3$  biologically independent samples per group, shown as mean  $\pm$  S.E.;  $**P = 0.0048$  by Student's two-tailed  $t$  test. **b**, Representative trace of PTH-treated huMDMs. **c**, Basal respiration, maximal respiration, and spare respiratory capacity in PTH-treated huMDMs;  $n = 4$  biologically independent samples per group, shown as mean  $\pm$  S.E.; Basal respiration:  $**P = 0.0023$ ; maximal respiration  $**P = 0.0019$ ; spare respiratory capacity:  $**P = 0.0089$ ; all by Student's two-tailed  $t$  test. **d**, ECAR in PTH-treated huMDMs;  $n = 3$  biologically independent samples per group,  $*P < 0.05$ . **e**, Hierarchical clustering of targeted metabolomics for glycolysis, pentose phosphate pathway, and citric acid cycle metabolites of huMDMs treated with PTH (500  $\mu\text{M}$ , 20 h;  $n = 3$  biologically independent samples per group). **f**, Targeted metabolomics from **e** with PTH-treated huMDMs reveals an upregulation of lactate, the pentose phosphate pathway and proinflammatory TCA intermediates (in red), similar to changes seen in *Qprt*<sup>-/-</sup> macrophages. **g**, Metabolism of  $^{13}\text{C}$ [TRP] to NAD<sup>+</sup> yields M+6-labeled NAD<sup>+</sup>.

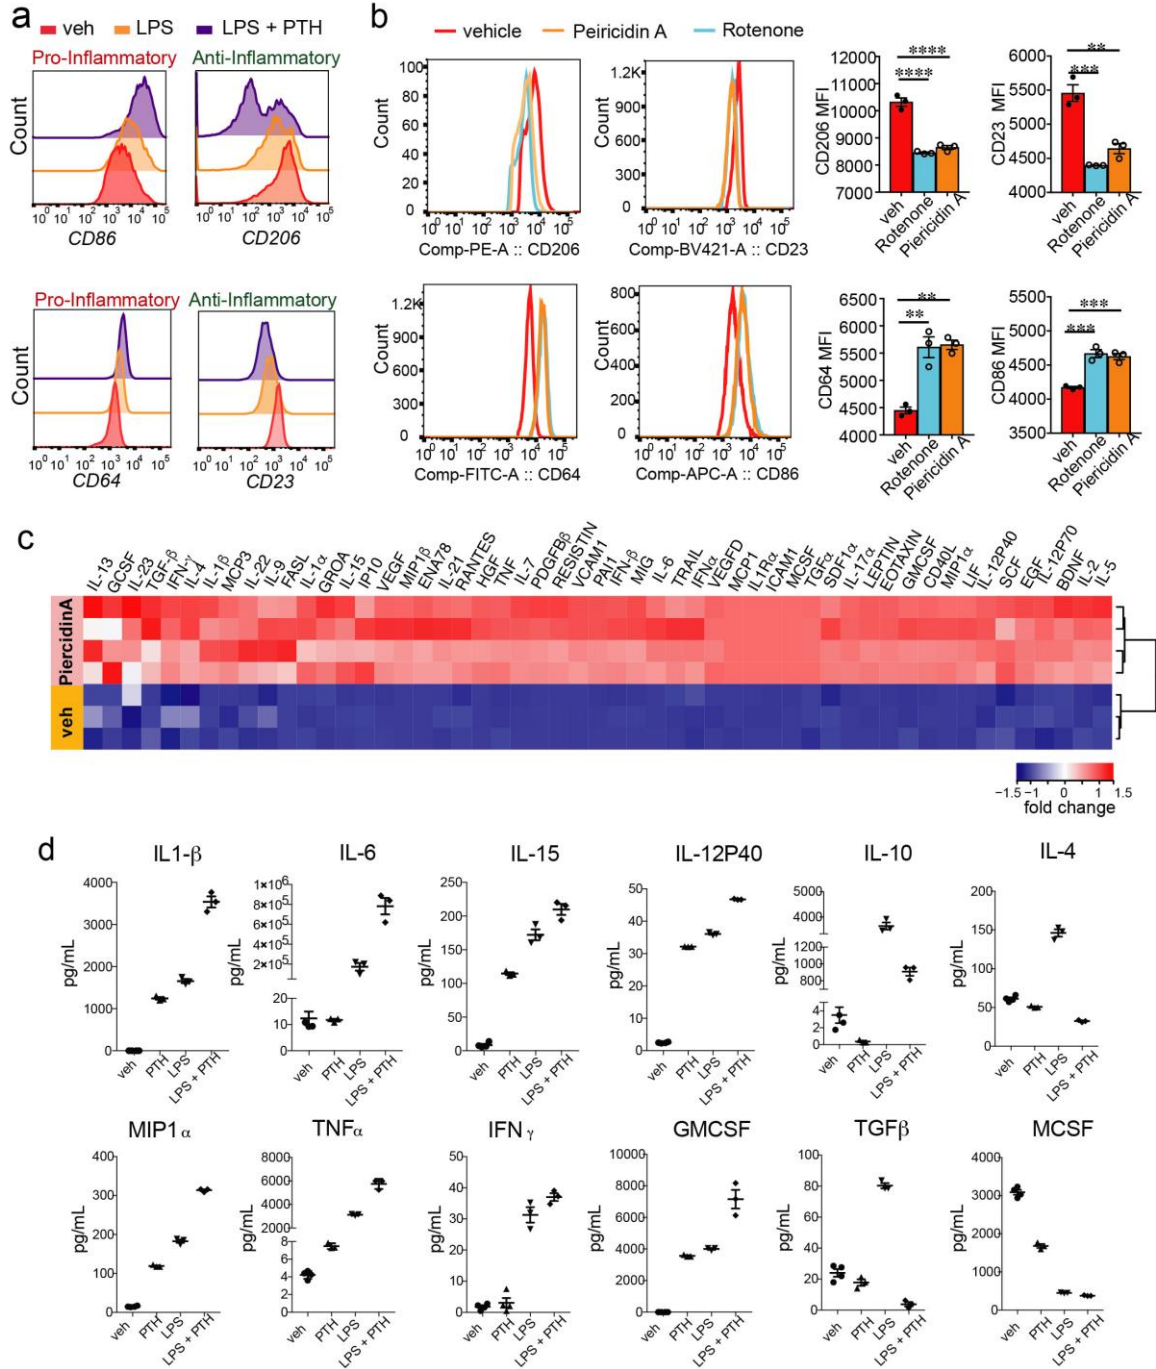

**Supplementary Figure 5**

**Effects of de novo NAD<sup>+</sup> synthesis on macrophage polarization.**

**a**, Representative histograms of three independent experiments for surface markers in huMDMs stimulated with LPS and phthalic acid (PTH). **b**, Complex I inhibitors rotenone and piericidin A (500 nM, 20 h) in huMDMs mimic the effect of QPRT inhibition ( $n = 3$  biologically independent samples per group, three independent flow experiments, represented as mean  $\pm$  S.E.;  $**P < 0.01$ ,  $***P < 0.001$ ,  $****P < 0.0001$  by Student's two-tailed  $t$  test). **c**, Hierarchical clustering of immune factors in huMDMs treated with either vehicle or piericidin A (500 nM, 20 h). **d**, Quantification of **c**. Significantly regulated immune factors in huMDMs stimulated with PTH and/or LPS,  $n = 3$  biologically independent samples per group, represented as mean  $\pm$  S.E.

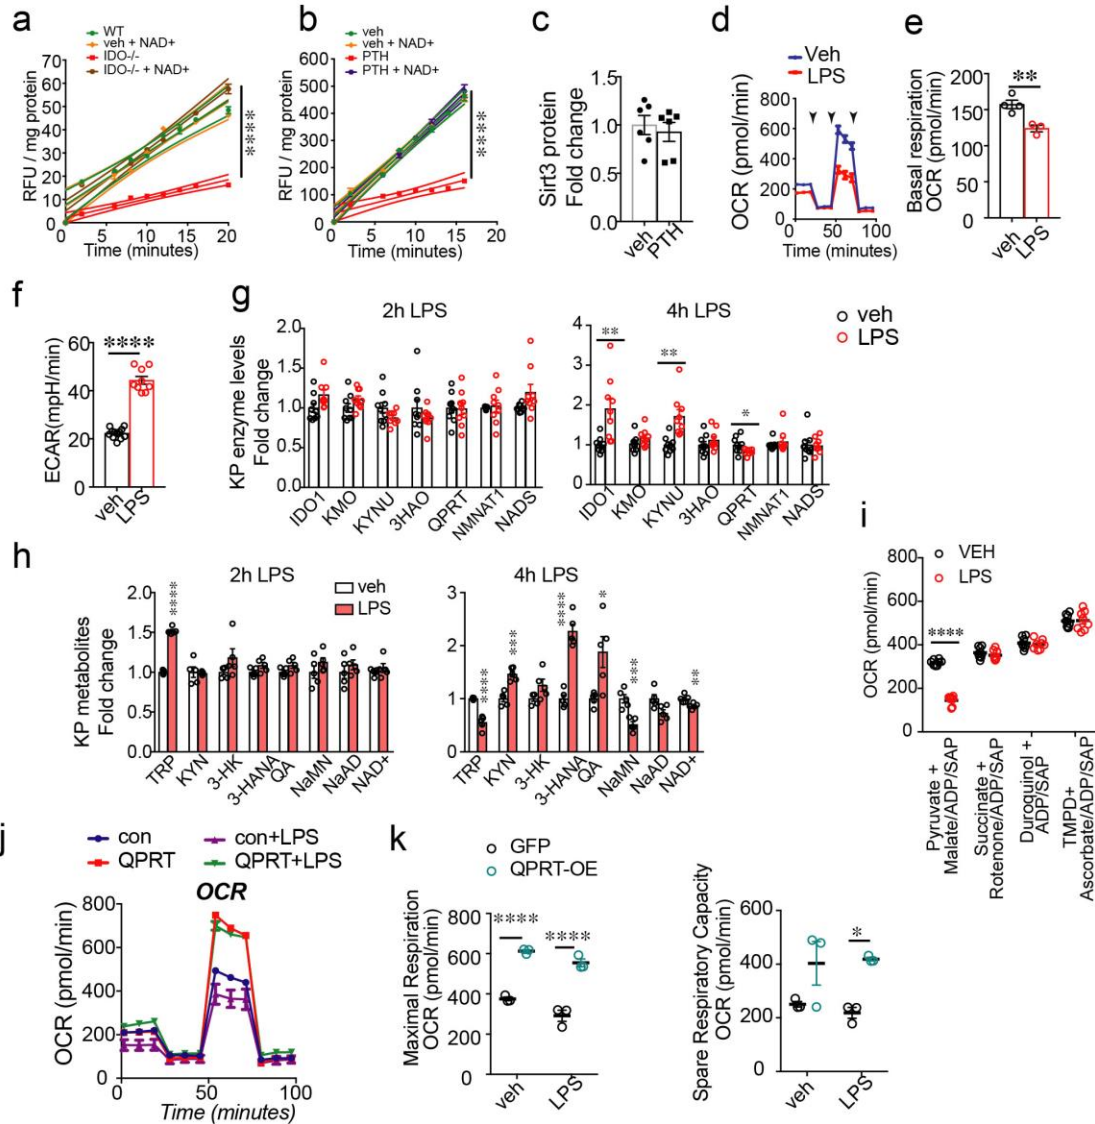

**Supplementary Figure 6**

**Effect of LPS on OXPHOS, the KP, and complex activities.**

**a**, Macrophages from WT and *Ido1*<sup>-/-</sup> mice supplemented ± NAD<sup>+</sup> (2 mM) and assayed for Sirt3 steady-state kinetics (*n* = 4 biologically independent samples/group, mean ± S.E.; \*\*\*\**P* < 0.0001 by linear regression analysis; curved thin lines denote 95% CI). **b**, Macrophages from huMDMs treated ± phthalic acid (PTH) (500 μM, 20 h) were supplemented ± NAD<sup>+</sup> (2 mM) and assayed for Sirt3 steady-state kinetics (*n* = 4 biologically independent samples per group, represented as mean ± S.E.; \*\*\*\**P* < 0.0001 by linear regression analysis; curved thin lines denote 95% CI). **c**, Quantitative immunoblot of Sirt3 levels in huMDMs ± PTH (500 μM, 20 h), normalized to actin (*n* = 6 biologically independent samples per group, represented as mean ± S.E.; non-significance determined by Student's two-tailed *t* test). **d**, OCR trace for huMDMs treated with either LPS (100 ng/mL) or vehicle for 20 h. **e**, Basal respiration in huMDMs following LPS (*n* = 5 biologically independent samples per veh group, *n* = 6 biologically independent samples per LPS group, represented as mean ± S.E.; \*\**P* < 0.01 by Student's two-tailed *t* test). **f**, ECAR in huMDMs (*n* = 9 biologically independent samples/group, mean ± S.E.; \*\*\*\**P* < 0.0001 by Student's two-tailed *t* test). **g**, Changes in KP enzyme levels by quantitative western analysis are observed by 4 h after LPS challenge in huMDMs (*n* = 8 biologically independent samples per veh group, *n* = 9 biologically independent samples per LPS group, represented as mean ± S.E.; \*\**P* < 0.01 and \**P* < 0.05 by Student's two-tailed *t* test). **h**, Increases in KP metabolites are observed by 4 h after LPS challenge in huMDMs (*n* = 5 biologically independent samples per group, represented as mean ± S.E.; \*\*\*\**P* < 0.0001, \*\*\**P* < 0.001, \*\**P* < 0.01, and \**P* < 0.05 by Student's two-tailed *t* test). **i**, Permeabilized huMDMs ± LPS (100 ng/mL) were stimulated with complex-specific substrates, including pyruvate + malate for assessing complex I, succinate + rotenone for complex II, duroquinol for complex III, and TMPD + ascorbate for complex IV (*n* = 8 biologically independent samples per group, represented as mean ± S.E.; \*\*\*\**P* < 0.0001 by Student's two-tailed *t* test). **j**, OCR trace for huMDMs transfected with either GFP control vector or QPRT vector, stimulated with LPS (100 ng/mL) and assayed at 20 h (*n* = 6 biologically independent samples per

group, represented as mean  $\pm$  S.E.). **k**, Maximal respiration and spare respiratory capacity of control- and QPRT-transfected huMDMs  $\pm$  LPS ( $n = 6$  biologically independent samples per group, represented as mean  $\pm$  S.E.; two-way ANOVA, effect of QPRT  $P < 0.0001$  and  $P < 0.01$  for maximal respiration and spare respiratory capacity, respectively; effect of LPS  $P < 0.01$  for maximal respiration; Tukey post hoc test:  $*P < 0.05$ ,  $**P < 0.01$ ,  $***P < 0.0001$ ).

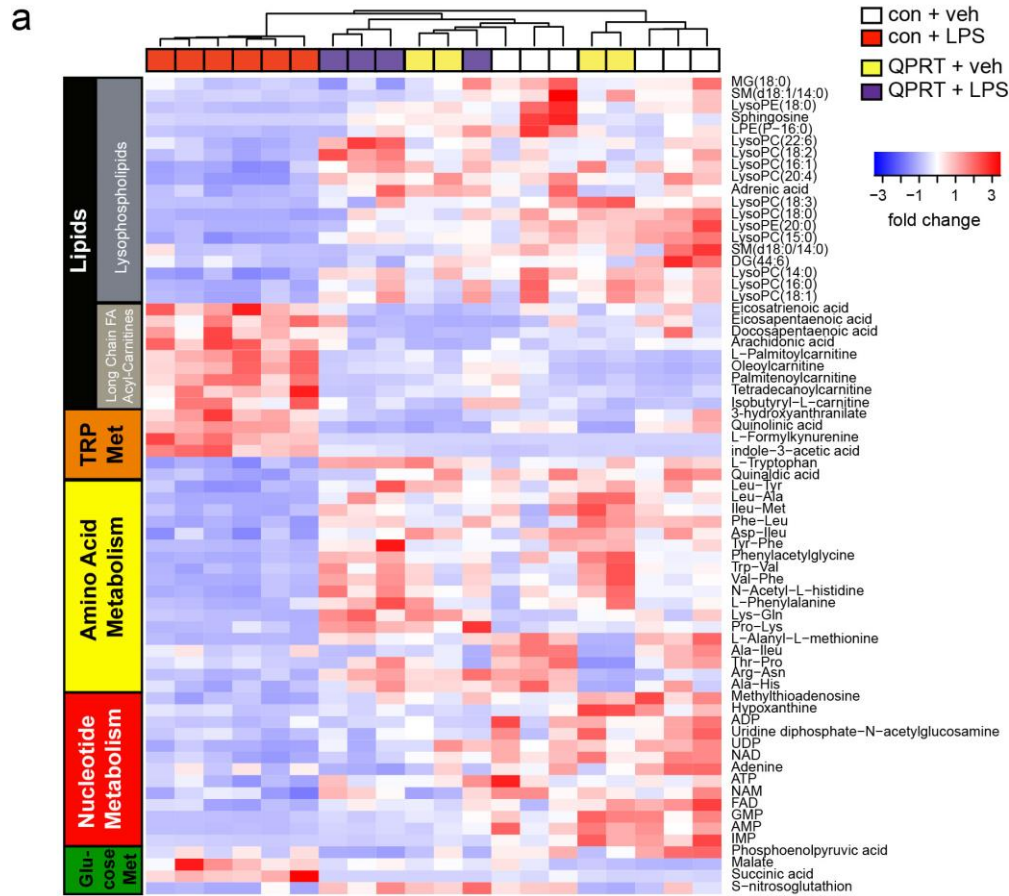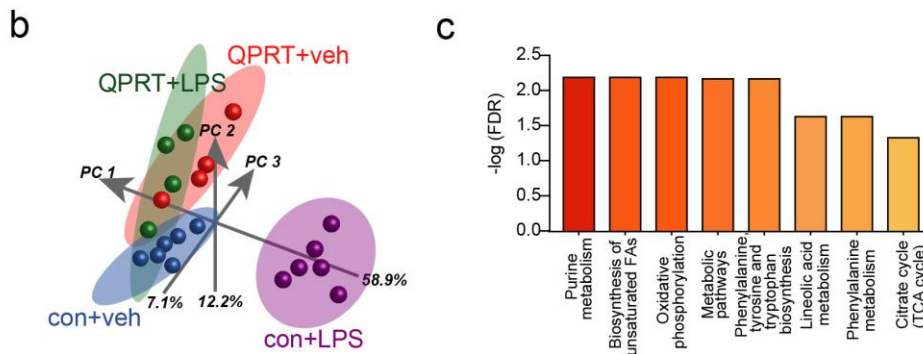

**Supplementary Figure 7**

**Overexpression of QPRT rescues metabolic changes induced by LPS in huMDMs.**

Untargeted metabolomics analysis was carried out on huMDMs  $\pm$  LPS transfected with either GFP control vector or QPRT vector. **a**, Hierarchical clustering of significant validated metabolites is shown ( $q < 0.05$  by Student's two-tailed t test with FDR correction for multiple hypotheses; see Methods). Hierarchical clustering reveals rescue of altered amino acid, fatty acid, nucleotide, and glucose metabolism with QPRT overexpression in LPS-stimulated huMDMs ( $n = 6$  biologically independent samples per the con + LPS and con + veh groups,  $n = 4$  biologically independent samples per group for all others). **b**, Principal-component analysis of **a**; untargeted metabolomics shows separation of LPS-treated control huMDMs from the QPRT + veh, QPRT + LPS, and con + veh groups ( $n = 6$  biologically independent samples per the con + LPS and con + veh groups,  $n = 4$  biologically independent samples per group for all others). **c**, Enrichment of KEGG pathways ( $n = 6$  biologically independent samples per the con + LPS and con + veh groups,  $n = 4$  biologically independent samples per group for all others).

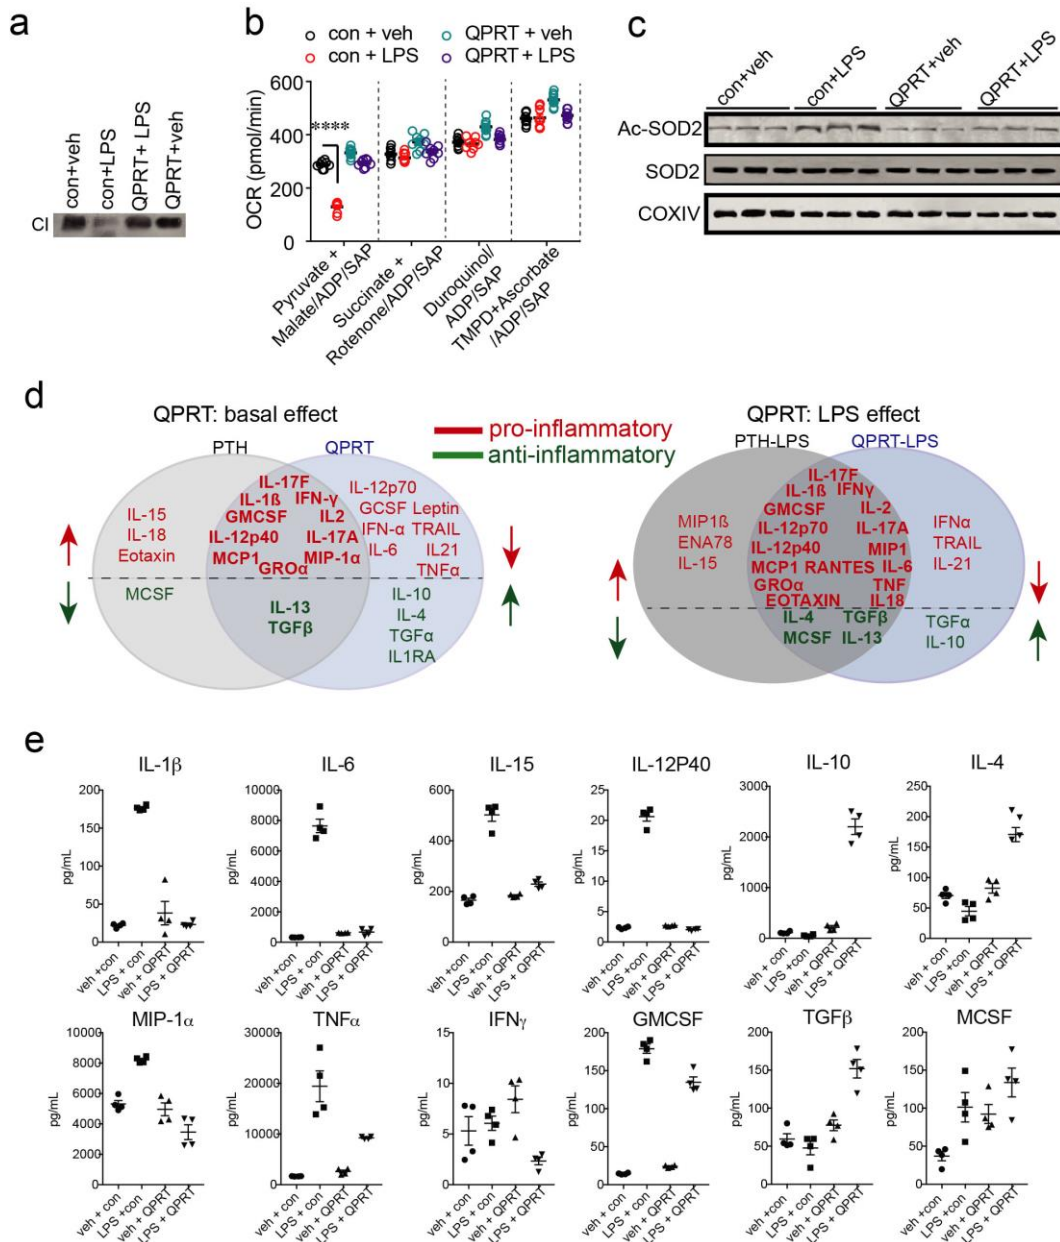

**Supplementary Figure 8**

**Effect of increased de novo NAD<sup>+</sup> on immune factor generation in LPS-stimulated macrophages.**

HuMDMs transfected with either GFP control vector or QPR1 vector were stimulated with LPS for 20 h. **a**, Representative BN-PAGE from three independent experiments. **b**, Permeabilized huMDMs  $\pm$  LPS were stimulated with complex-specific substrates ( $n = 8$  biologically independent samples per group, represented as mean  $\pm$  S.E.; \*\*\*\* $P < 0.0001$  by Student's two-tailed  $t$  test). **c**, Representative immunoblot from two independent experiments of SOD2, Ac-SOD2, and COXIV loading control. **d**, Comparison of proinflammatory (in red) and anti-inflammatory (in green) factors that are upregulated and downregulated by QPR1 inhibition with phthalic acid (PTH) versus QPR1 overexpression under basal conditions (left) and LPS-stimulated conditions (right). Note the similarity of subsets of the pro- and anti-inflammatory factors and reciprocal regulation in control versus experimental conditions. **e**, Representative immune factors regulated by QPR1 overexpression in huMDMs  $\pm$  LPS ( $n = 3$  biologically independent samples per group, represented as mean  $\pm$  S.E.).

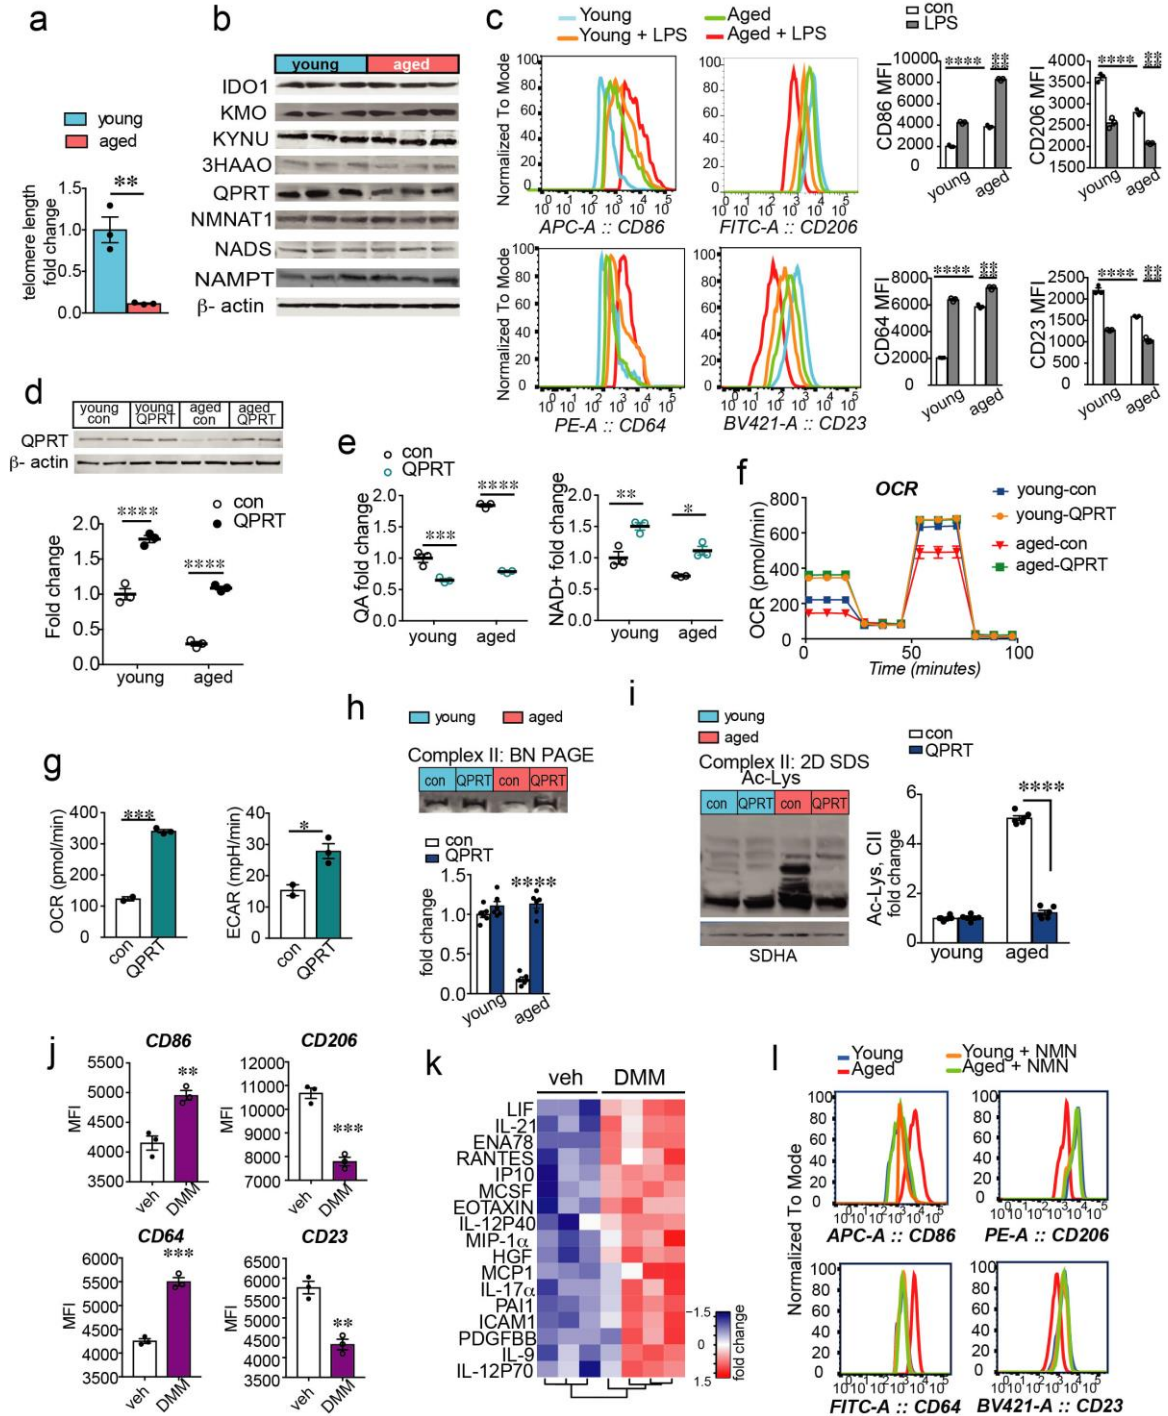

Supplementary Figure 9

### De novo NAD<sup>+</sup> synthesis regulates mitochondrial respiration and polarization state in aged macrophages.

Young and aged huMDMs were derived from human subjects  $\leq 35$  and  $\geq 65$  years old, respectively. **a**, qPCR of the telomere length of young versus aged macrophages ( $n = 3$  biologically independent samples per group, mean  $\pm$  S.E.;  $**P = 0.0046$  by Student's two-tailed  $t$  test). **b**, Representative immunoblots from three independent experiments for all KP enzymes demonstrates loss of QPRT expression in aged macrophages as compared to young macrophages. **c**, Mean fluorescence intensities (MFI) increase for proinflammatory markers CD86 and CD64 and decrease for anti-inflammatory markers CD206 and CD23 in aged versus young huMDMs  $\pm$  LPS;  $n = 3$  biologically independent samples per group, represented as mean  $\pm$  S.E.; two-way ANOVA: effects of age and LPS,  $P < 0.0001$  for all



four surface markers; Tukey post hoc test \*\*\*\* $P < 0.0001$ . **d–i**, Young and aged huMDMs were transfected with either control vector (con) or QPRT vector (QPRT). **d**, Top, representative immunoblot from two independent experiments of huMDMs derived from young and aged subjects transfected with control or QPRT vectors. Bottom, quantification of changes in QPRT protein levels;  $n = 3$  biologically independent samples/group, mean  $\pm$  S.E.; two-way ANOVA, effects of age and QPRT  $P < 0.0001$ ; Tukey post hoc test \*\*\*\* $P < 0.0001$ . **e**, QPRT overexpression increases metabolism of QA to  $\text{NAD}^+$  and restores  $\text{NAD}^+$  levels in aged macrophages to those of young huMDMs;  $n = 3$  biologically independent samples per group, represented as mean  $\pm$  S.E.; two-way ANOVA, effect of age and QPRT for QA,  $P < 0.0001$ ; two-way ANOVA, effect of age and QPRT for  $\text{NAD}^+$ ,  $P < 0.01$ ; Tukey post hoc test \*\*\*\* $P < 0.0001$ . **f**, OCR trace for young and aged control or QPRT-expressing huMDMs;  $n = 3$  biologically independent samples per group, mean  $\pm$  s.d. **g**, Basal respiration and ECAR in aged control and QPRT-expressing huMDMs;  $n = 2$  biologically independent samples per con group,  $n = 3$  biologically independent samples per QPRT-OE group, mean  $\pm$  s.d.; \* $P = 0.034$  and \*\*\* $P = 0.0001$  by Student's two-tailed  $t$  test. **h**, Top, representative BN-PAGE of complex II activity in young and aged huMDMs transfected with either control or QPRT vectors. Bottom, quantification of complex II activity;  $n = 6$  biologically independent samples per group, mean  $\pm$  S.E.; two-way ANOVA, effect of age and QPRT,  $P < 0.0001$ ; Tukey post-hoc test, \*\*\*\* $P < 0.0001$ . **i**, Left, representative 2D SDS immunoblot from two independent experiments of complex II in young and aged huMDMs  $\pm$ , assayed for acetyl-lysine immunoreactivity. Right, quantification of acetyl-lysines in complex II;  $n = 6$  biologically independent samples/group, mean  $\pm$  S.E.; two-way ANOVA, effects of age and QPRT,  $P < 0.0001$ ; Tukey post hoc test \*\*\*\* $P < 0.0001$ . **j**, MFI of huMDMs treated with the complex II inhibitor dimethyl malonate (DMM, 1 mM, 20 h);  $n = 3$  biologically independent samples/group, mean  $\pm$  S.E.; CD86 \*\* $P = 0.0083$ , CD64 \*\*\* $P = 0.0003$ , CD206 \*\*\* $P = 0.0005$ , CD23 \*\* $P = 0.0022$  by Student's two-tailed  $t$  test. **k**, Cytokine/chemokine profiles of culture medium from huMDMs stimulated with DMM (1 mM, 20 h). **l**, Representative histograms from three independent experiments of young and aged huMDMs supplemented with NMN (10  $\mu\text{M}$ , 20 h).

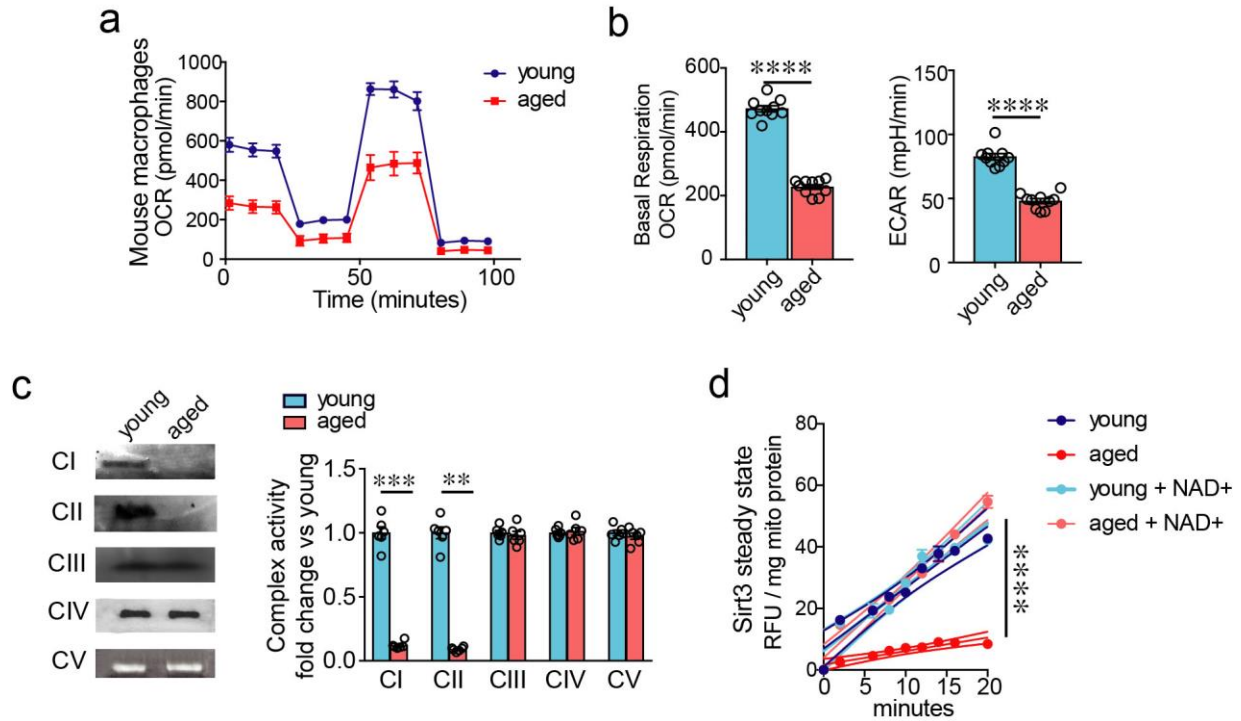

**Supplementary Figure 10**

**Mitochondrial respiration decreases in aged mouse macrophages.**

Primary peritoneal macrophages from young (3 month) and aged (16–20 month) mice were examined for mitochondrial respiration, complex activity, and mitochondrial sirtuin steady-state kinetics. **a**, Real-time changes in OCR in young versus aged primary macrophages ( $n = 10$  biologically independent samples per group). **b**, Quantification of basal respiration and extracellular acidification rate (ECAR);  $n = 10$  biologically independent samples per group, represented as mean  $\pm$  S.E.; \*\*\*\* $P < 0.0001$  by Student's two-tailed  $t$  test. **c**, Left, representative BN-PAGE from three independent experiments of complex activities in young versus aged mouse primary macrophages. Right, quantification demonstrates reduced complex I and complex II activities,  $n = 6$  biologically independent samples per group, represented as mean  $\pm$  S.E.; \*\*\*\* $P < 0.0001$  by Student's two-tailed  $t$  test. **d**, Young and aged mouse macrophages were assayed for mitochondrial Sirt3 steady-state kinetics;  $n = 4$  biologically independent samples per group, represented as mean  $\pm$  S.E.; \*\*\*\* $P < 0.0001$  by linear regression analysis; curved thin lines denote 95% CI.

## Supplementary Tables

**Supplementary Table 1.** Western Blot Antibodies

| <b>Antibody</b> | <b>Source</b>                 | <b>Dilution</b> | <b>Catalog No.</b> |
|-----------------|-------------------------------|-----------------|--------------------|
| Anti-Ido1       | Abcam                         | 2µg/ml          | ab55305            |
| Anti-Kmo        | Abcam                         | 1µg/ml          | ab130959           |
| Anti-Kynu       | Abcam                         | 1:1000          | ab225916           |
| Anti-3haao      | Abcam                         | 2µg/ml          | ab106436           |
| Anti-Human Qprt | Abcam                         | 1:1000          | ab171944           |
| Anti-Mouse Qprt | Sigma-Aldrich                 | 1µg/ml          | SAB1410425         |
| Anti-Nmnat1     | Abcam                         | 1µg/ml          | ab45652            |
| Anti-NadS       | Abcam                         | 1:1000          | ab45890            |
| Anti-Drp1       | BD Transduction Laboratories™ | 1:1000          | 611113             |
| Anti-Fis1       | Proteintech                   | 1:1000          | 10956-1-AP         |
| Anti-LC3BII     | Cell Signaling Technology     | 1:1000          | 3868               |
| Anti-Mff        | Proteintech                   | 1:1000          | 17090-1-AP         |
| Anti-Mfn1       | Abcam                         | 1:500           | ab57602            |
| Anti-Mfn2       | Proteintech                   | 1:500           | 12186-1-AP         |
| Anti-Opa1       | Santa Cruz Biotechnology      | 1:500           | sc-393296          |
| Anti-TIM17      | Santa Cruz Biotechnology      | 1:500           | sc-271152          |
| Anti-TOM20      | Santa Cruz Biotechnology      | 1:1000          | sc-11415           |
| Anti-VDAC       | Abcam                         | 1:2000          | 14734              |
| Anti-Sirt3      | Cell Signaling Technology     | 1:1000          | C73E3              |
| Anti-Sod2-K68   | Abcam                         | 1:1000          | ab137037           |
| Anti-Sod2       | Abcam                         | 1:1000          | ab16956            |
| Anti-Ndufc2     | Abcam                         | 1µg/ml          | ab85359            |
| Anti-COXIV      | Abcam                         | 1µg/ml          | ab14744            |
| Anti-PAR        | Trevigen                      | 1:1000          | 4335-MC-100        |

|                      |                           |        |      |
|----------------------|---------------------------|--------|------|
| Anti- $\beta$ -actin | Cell Signaling Technology | 1:2000 | 3700 |
|----------------------|---------------------------|--------|------|

**Supplementary Table 2.** Flow Cytometry Antibodies

| Marker                 | Species Reactivity | Channel     | Catalog #  | Dilution | Clone       | Source         |
|------------------------|--------------------|-------------|------------|----------|-------------|----------------|
| CD14                   | Human              | APC-Cy7     | 557831     | 1:50     | M $\phi$ P9 | BD Biosciences |
| CD64                   | Human              | FITC        | 560970     | 1:50     | 10.1        | BD Biosciences |
| CD206                  | Human              | PE          | 566281     | 1:50     | 19.2        | BD Biosciences |
| CD68                   | Human              | PE-Cy7      | 565595     | 1:200    | Y1/82A      | BD Biosciences |
| CD23                   | Human              | BV421       | 338521     | 1:50     | EBVCS-5     | BD Biosciences |
| CD163                  | Human              | 563889      | 555660     | 1:50     | GHI/61      | BD Biosciences |
| CD86                   | Human              | APC         | 555660     | 1:50     | FUN-1       | BD Biosciences |
| EGR-2                  | Mouse              | APC         | 1706691-82 | 1:50     | ERONGR2     | Invitrogen     |
| CD206                  | Mouse              | BV711       | 141727     | 1:50     | C068C2      | BioLegend      |
| CD301                  | Mouse              | PE          | 145703     | 1:50     | LOM-14      | BioLegend      |
| CD80                   | Mouse              | BV421       | 562611     | 1:50     | 16-10A1     | BD Biosciences |
| CD86                   | Mouse              | BV605       | 563055     | 1:50     | GL1         | BD Biosciences |
| I-A/I-E (MHC Class II) | Mouse              | PerCP-Cy5.5 | 562363     | 1:50     | M5/114.15.2 | BD Biosciences |
| CD14                   | Mouse              | PE-Cy7      | 553740     | 1:50     | rmC5-3      | BD Biosciences |

**Supplementary Table 3.** Electron Transport Chain Complex Substrates

|             |                                                                                                           |
|-------------|-----------------------------------------------------------------------------------------------------------|
| Complex I   | 2mM Tris-HCl, pH 7.4<br>0.1 mg/ml NADH<br>2.5 mg/ml nitroterazolium blue                                  |
| Complex II  | 4.5mM EDTA<br>10mM KCN<br>0.2mM phenazine methasulfate<br>84mM succinic acid<br>50mM nitroterazolium blue |
| Complex III | 50mM sodium phosphate, pH 7.2<br>0.5 mg/ml diaminobenzidine                                               |
| Complex IV  | 50mM sodium phosphate, pH 7.2<br>0.5 mg/ml diaminobenzidine<br>1 mg/ml horse heart cytochrome c           |
| Complex V   | 35mM Tris<br>270mM glycine<br>14mM MgSO <sub>4</sub><br>0.2% Pb(NO <sub>3</sub> ) <sub>2</sub><br>8mM ATP |

**Supplementary Table 4.** Reagents for telomere length PCR

| Oligonucleotides                                         |                                       |
|----------------------------------------------------------|---------------------------------------|
| Telomere FWD:<br>GGTTTTGAGGGTGAGGGTGAGGGTGAGGGTGAGGGT    | Cawthon <i>Nucleic Acids Res</i> 2002 |
| Telomere REV:<br>TCCCGACTATCCCTATCCCTATCCCTATCCCTATCCCTA | Cawthon <i>Nucleic Acids Res</i> 2002 |
| 36B4d FWD:<br>CCCATTCTATCATCAACGGGTACAA                  | Cawthon <i>Nucleic Acids Res</i> 2002 |
| 36B4d REV:<br>CAGCAAGTGGGAAGGTGTAATCC                    | Cawthon <i>Nucleic Acids Res</i> 2002 |

**Supplementary Table 5.** Vectors for HEK positive controls of KP and NAD-synthesis enzymes

| Vectors                   |         |          |
|---------------------------|---------|----------|
| pCMV-A-GFP-tagged plasmid | Origene | PS100026 |

|                                                                             |         |          |
|-----------------------------------------------------------------------------|---------|----------|
| pCMV-XL5-IDO1-Human Indoleamine-2,3-dioxygenase plasmid                     | Origene | SC126221 |
| pCMV-XL5-KMO-Human Kynurenine-3-monoxygenase plasmid                        | Origene | SC117858 |
| pCMV-AC-KYNU-Human Kynurenine Hydroxylase plasmid                           | Origene | SC322236 |
| pCMV-HAAO-Human 3-hydroxyanthranilate 3,4-dioxygenase                       | Origene | SC310572 |
| pCMV-QPRT-Myc-DDK-Human Quinolinate Phosphoribosyltransferase plasmid       | Origene | RC202960 |
| pCMV-XL5-NMNAT1-Human Nicotinamide Nucleotide Adenylyltransferase 1 plasmid | Origene | SC122936 |
| pCMV-XL5-NADSYN1-Human NAD Synthetase plasmid                               | Origene | SC113723 |
